# Supplementary material for: Spin-active metallofullerene stabilized by the core of an NC moiety
Source: Royal Society of Chemistry journal article supplement (doi:10.1039/c3cc38445d), 2013-01-01
Supplement: c3cc38445d.pdf [file c3cc38445d.pdf]

## Supporting Information

### Spin-Active Metallofullerene Stabilized by the Core of NC Moiety

Yongqiang Feng,<sup>a</sup> Taishan Wang,<sup>\*,a</sup> Jingyi Wu,<sup>b</sup> Yihan Ma,<sup>a</sup> Zhuxia Zhang,<sup>a</sup> Li Jiang,<sup>a</sup> Chunhua Ge,<sup>\*,c</sup> Chunying Shu,<sup>a</sup> and Chunru Wang<sup>\*,a</sup>

*a* Key Laboratory of Molecular Nanostructure and Nanotechnology, Beijing National Laboratory for Molecular Sciences, Institute of Chemistry, Chinese Academy of Sciences, Beijing, 100190, China. Fax: 86-10-62652120; Tel: 86-10-62652120; E-mail: wangtais@iccas.ac.cn, crwang@iccas.ac.cn

*b* Laboratory of Nuclear Analysis Techniques, Institute of High Energy Physics, Chinese Academy of Sciences, Beijing, 100049, China

*c* College of Chemistry, Liaoning University, Shenyang, 110036, China Tel: 86-24-62202550; E-mail: chhge@lnu.edu.cn

### Contents

**Figure S1.** Chromatogram of the isolated Sc<sub>3</sub>NC@C<sub>80</sub> (20×250 mm Buckyprep column; flow rate 12 mL/min; toluene as eluent).

**Figure S2.** Chromatogram of the isolated Sc<sub>3</sub>NC@C<sub>80</sub> (20×250 mm Buckyprep-M column; flow rate 12 mL/min; toluene as eluent).

**Figure S3.** MALDI-TOF mass spectrum of Sc<sub>3</sub>NC@C<sub>80</sub>.

**Figure S4.** Cyclic voltammogram of Sc<sub>3</sub>NC@C<sub>80</sub> (*o*-dichlorobenzene, 0.05 mol/L TBAPF<sub>6</sub>, 50 mV · s<sup>-1</sup> scan rate).

**Table S1.** The hfcc and g-factor values of several paramagnetic metallofullerenes

**Table S2.** Calculated hfcc values of Sc, N, and C nuclei in different internal geometries of Sc<sub>3</sub>NC@C<sub>80</sub> anion with ORCA package.

### **Experimental Section:**

#### **1. The synthesis and purification of Sc<sub>3</sub>NC@C<sub>80</sub>**

The Sc<sub>3</sub>NC@C<sub>80</sub>-I<sub>h</sub> was prepared as reported before.<sup>1</sup> Briefly, the mixture of graphite powder and Sc/Ni<sub>2</sub> alloy with a mass ratio of 1:2 was packed into core-drilled graphite rods. Subsequently the rods were burnt in a Krätschmer-Huffman generator under an atmosphere of 6 Torr N<sub>2</sub> and 194 Torr He. The as-prepared soot was Soxlet-extracted with toluene for 24 h. Sc<sub>3</sub>NC@C<sub>80</sub> was isolated and purified by multi-step HPLC.<sup>1</sup> Figure S1 and S2 show HPLC data of purified Sc<sub>3</sub>NC@C<sub>80</sub> sample. MALDI-TOF mass spectrum was also performed to confirm its high purity, see Figure S3.

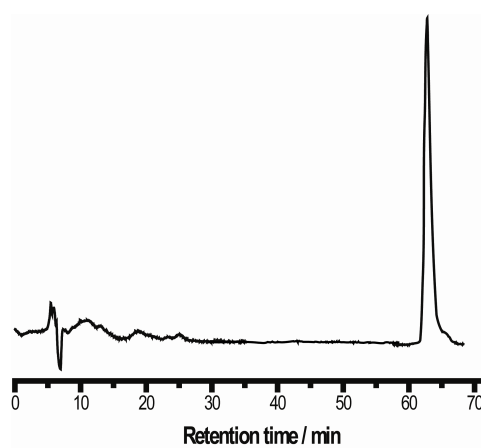

**Figure S1.** Chromatogram of the isolated Sc<sub>3</sub>NC@C<sub>80</sub> (20×250 mm Buckyprep column; flow rate 12 mL/min; toluene as eluent).

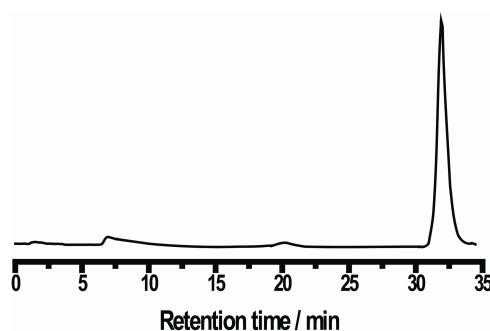

**Figure S2.** Chromatogram of the isolated Sc<sub>3</sub>NC@C<sub>80</sub> (20×250 mm Buckyprep-M column; flow rate 12 mL/min; toluene as eluent).

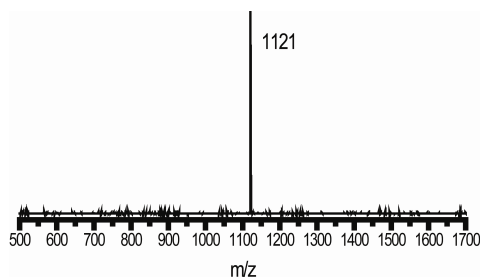

**Figure S3.** MALDI-TOF mass spectrum of  $\text{Sc}_3\text{NC}@C_{80}$ .

## 2. Cyclic voltammogram of $\text{Sc}_3\text{NC}@C_{80}$

Electrochemistry experiments were carried out in *o*-DCB solvent containing 0.05 M  $(n\text{-Bu})_4\text{NPF}_6$  with glassy carbon as the working, Pt wire and Ag wire as the counter and reference electrodes, respectively, at a scan rate of  $100 \text{ mV s}^{-1}$ . The potentials were referred to the  $E_{1/2}$  value of the  $\text{Fc}/\text{Fc}^+$  redox couple measured in the sample solution. Figure S4 shows the CV of  $\text{Sc}_3\text{NC}@C_{80}$ .

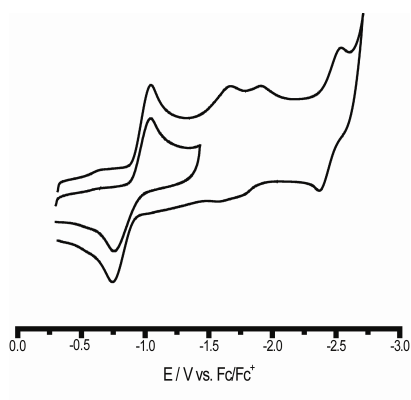

**Figure S4.** Cyclic voltammogram of  $\text{Sc}_3\text{NC}@C_{80}$  (*o*-dichlorobenzene, 0.05 mol/L TBAPF<sub>6</sub>,  $50 \text{ mV} \cdot \text{s}^{-1}$  scan rate).

## 3. ESR experiment of $\text{Sc}_3\text{NC}@C_{80}$ anion radical

$\text{Sc}_3\text{NC}@C_{80}$  anion radical was obtained by contacting metal potassium with a solution of  $\text{Sc}_3\text{NC}@C_{80}$  in THF for several times.<sup>2</sup> Subsequently the solution was sealed in a quartz tube after removing oxygen by bubbling nitrogen. ESR experiment was performed on a Bruker ESR spectrometer with continuous wave of X-band at room temperature.

**Table S1.** The hfcc and g-factor values of several paramagnetic metallofullerenes

| Metallofullerenes                                                   | a (G)        | g      |
|---------------------------------------------------------------------|--------------|--------|
| Sc <sub>3</sub> N@C <sub>68</sub> cation <sup>a,b</sup>             | 1.289        | 2.0010 |
| Sc <sub>3</sub> N@C <sub>80</sub> anion <sup>c</sup>                | 55.6         | 1.9984 |
| Y <sub>2</sub> @C <sub>79</sub> N <sup>d</sup>                      | 81.23        | 1.9740 |
| Sc <sub>4</sub> O <sub>2</sub> @C <sub>80</sub> cation <sup>e</sup> | 18, 150.4    | 1.9956 |
| Sc <sub>4</sub> O <sub>2</sub> @C <sub>80</sub> anion <sup>e</sup>  | 2.6, 27.4    | 1.9960 |
| Sc <sub>3</sub> C <sub>2</sub> @C <sub>80</sub> <sup>f</sup>        | 6.256        | 2.0006 |
| Sc <sub>3</sub> NC@C <sub>80</sub> anion                            | 3.890, 1.964 | 2.0031 |

a S. Yang, P. Rapta and L. Dunsch, *Chem. Commun.*, 2007, 189–191.

b P. Rapta, A. A. Popov, S. Yang and L. Dunsch, *J. Phys. Chem. A*, 2008, **112**, 5858–5865.

c P. Jakes and K.-P. Dinse, *J. Am. Chem. Soc.*, 2001, **123**, 8854–8855.

d T. Zuo, L. Xu, C. M. Beavers, M. M. Olmstead, W. Fu, T. D. Crawford, A. L. Balch and H. C. Dorn, *J. Am. Chem. Soc.*, 2008, **130**, 12992–12997.

e A. A. Popov, N. Chen, J. R. Pinzón, S. Stevenson, L. A. Echegoyen and L. Dunsch, *J. Am. Chem. Soc.*, 2012, **134**, 19607–19618

f T. Wang, J. Wu, W. Xu, J. Xiang, X. Lu, B. Li, L. Jiang, C. Shu and C. Wang, *Angew. Chem., Int. Ed.*, 2010, **49**, 1786–1789.

### Calculation Section:

All the density functional theory (DFT) computations were performed by using the Dmol3 code<sup>3,4</sup> with the generalized gradient approximation (GGA) functional of Perdew, Burke, and Ernzerhof (PBE).<sup>5</sup> For closed- and open-shell systems, the spin-restricted and spin-unrestricted algorithms were used, respectively. All-electron double-numerical basis set with polarization functions (DNP) was applied for all atoms. To take into account relativistic effects, the all-electron scalar relativistic method utilizing the Douglas-Kroll-Hess (DKH) Hamiltonian,<sup>6,7</sup> which is the most accurate approach available in DMol<sup>3</sup> package, was chosen.

Computations of hfc constants with the ORCA package<sup>8, 9</sup> were performed with two combinations of basis sets. One employed the TZVP {5,3,1}/(11s,6p,1d) basis set<sup>10</sup> for carbon atoms, {5,3,2}/(11s,6p,2d), and Sc, {6,5,4,2}/(17s12p7d2f) (f and g polarization functions were removed from the original def2-TZVP basis for Sc, respectively).

**Table S2.** Calculated hfcc values of Sc, N, and C nuclei in different internal geometries of  $\text{Sc}_3\text{NC@C}_{80}$  anion with ORCA package.

|                                                     | Sc1      | Sc2      | Sc3      | N        | C        |
|-----------------------------------------------------|----------|----------|----------|----------|----------|
| $\text{Sc}_3\text{NC@C}_{80}^{\cdot-}$ (N-centered) | -2.60452 | -2.32169 | -4.45982 | -1.117   | 3.712665 |
| $\text{Sc}_3\text{NC@C}_{80}^{\cdot-}$ (C-centered) | -4.10091 | -3.94842 | -3.32803 | 1.349823 | -5.96963 |

## References

1. T. S. Wang, L. Feng, J. Y. Wu, W. Xu, J. F. Xiang, K. Tan, Y. H. Ma, J. P. Zheng, L. Jiang and X. Lu, *J. Am. Chem. Soc.*, 2010, **132**, 16362-16364.
2. P. Jakes and K. P. Dinse, *J. Am. Chem. Soc.*, 2001, **123**, 8854-8855.
3. B. Delley, *J. Chem. Phys.*, 1990, **92**, 508-517.
4. B. Delley, *J. Chem. Phys.*, 2000, **113**, 7756. DMol3 is available as part of Material Studio.
5. J. P. Perdew, K. Burke and M. Ernzerhof, *Phys. Rev. Lett.*, 1996, **77**, 3865-3868.
6. M. Douglas and N. M. Kroll, *Ann. Phys.*, 1974, **82**, 89-155.
7. D. Koelling and B. Harmon, *J. Phys. C*, 1977, **10**, 3107.
8. F. Neese, *Wiley Interdiscip. Rev.: Comput. Mol. Sci.*, 2012, **2**, 73-78.
9. F. Neese, ORCA, an ab Initio, Density Functional and Semiempirical Program Package, version 2.8; Institute for Physical and Theoretical Chemistry: Bonn, Germany, 2010.
10. A. Schäfer, H. Horn and R. Ahlrichs, *J. Chem. Phys.*, 1992, **97**, 2571-2577.
